# Supplementary material
Source: PubMed Central journal article supplement (PMC8461571)
Supplement: NIHMS1734389-supplement-2.pdf [file NIHMS1734389-supplement-2.pdf]

### A. N0

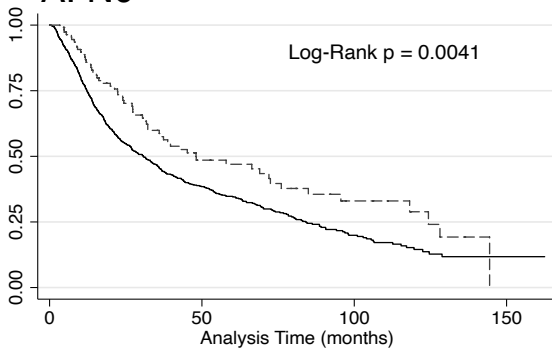

Number at risk

|       |     |     |    |   |
|-------|-----|-----|----|---|
| CRT   | 749 | 198 | 45 | 2 |
| S+Adj | 113 | 33  | 11 | 0 |

Legend: — CRT    - - - S+Adj

### B. N0

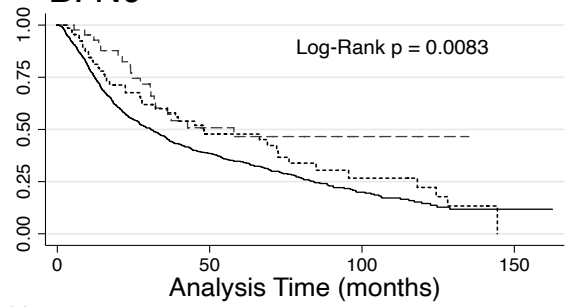

Number at risk

|       |     |     |    |   |
|-------|-----|-----|----|---|
| CRT   | 749 | 198 | 45 | 2 |
| S+CRT | 45  | 12  | 4  | 0 |
| S+RT  | 68  | 21  | 7  | 0 |

Legend: — CRT    - - - S+CRT  
..... S+RT

### C. N1

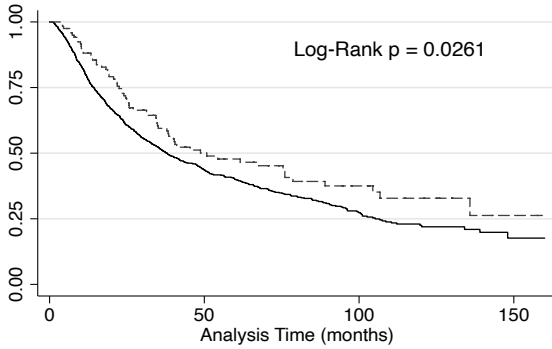

Number at risk

|       |      |     |    |   |
|-------|------|-----|----|---|
| CRT   | 1104 | 324 | 84 | 5 |
| S+Adj | 122  | 44  | 19 | 2 |

Legend: — CRT    - - - S+Adj

### D. N1

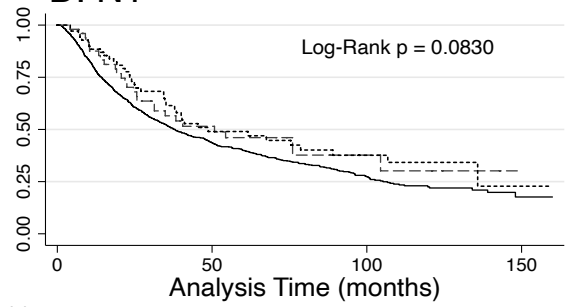

Number at risk

|       |      |     |    |   |
|-------|------|-----|----|---|
| CRT   | 1104 | 324 | 84 | 5 |
| S+CRT | 51   | 19  | 6  | 0 |
| S+RT  | 71   | 25  | 13 | 2 |

Legend: — CRT    - - - S+CRT  
..... S+RT

### E. N2

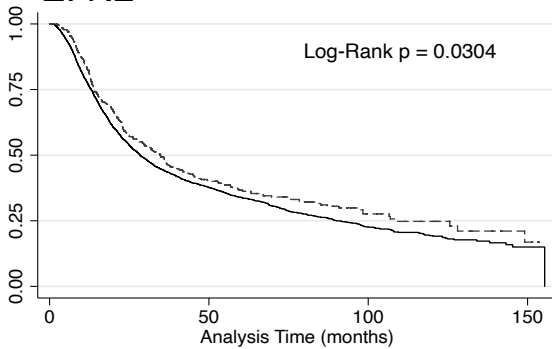

Number at risk

|       |      |     |     |   |
|-------|------|-----|-----|---|
| CRT   | 3076 | 701 | 169 | 7 |
| S+Adj | 466  | 116 | 34  | 4 |

Legend: — CRT    - - - S+Adj

### F. N2

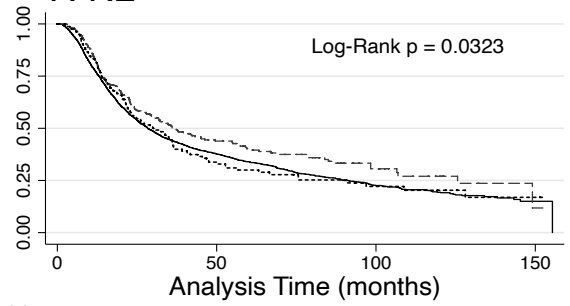

Number at risk

|       |      |     |     |   |
|-------|------|-----|-----|---|
| CRT   | 3076 | 701 | 169 | 7 |
| S+CRT | 308  | 79  | 22  | 1 |
| S+RT  | 158  | 37  | 12  | 3 |

Legend: — CRT    - - - S+CRT  
..... S+RT

### G. N3

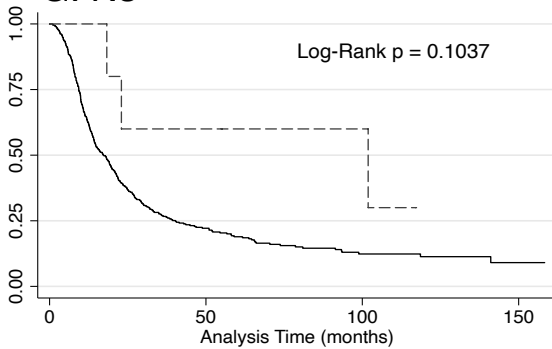

Number at risk

|       |     |    |    |   |
|-------|-----|----|----|---|
| CRT   | 420 | 63 | 18 | 2 |
| S+Adj | 5   | 3  | 2  | 0 |

Legend: — CRT    - - - S+Adj

### H. N3

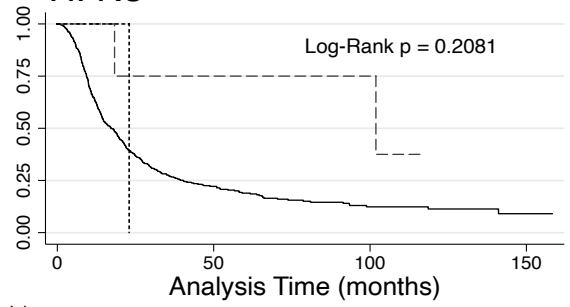

Number at risk

|       |     |    |    |   |
|-------|-----|----|----|---|
| CRT   | 420 | 63 | 18 | 2 |
| S+CRT | 4   | 3  | 2  | 0 |
| S+RT  | 1   | 0  | 0  | 0 |

Legend: — CRT    - - - S+CRT  
..... S+RT
