# Supplementary material
Source: PubMed Central journal article supplement (PMC8461571)

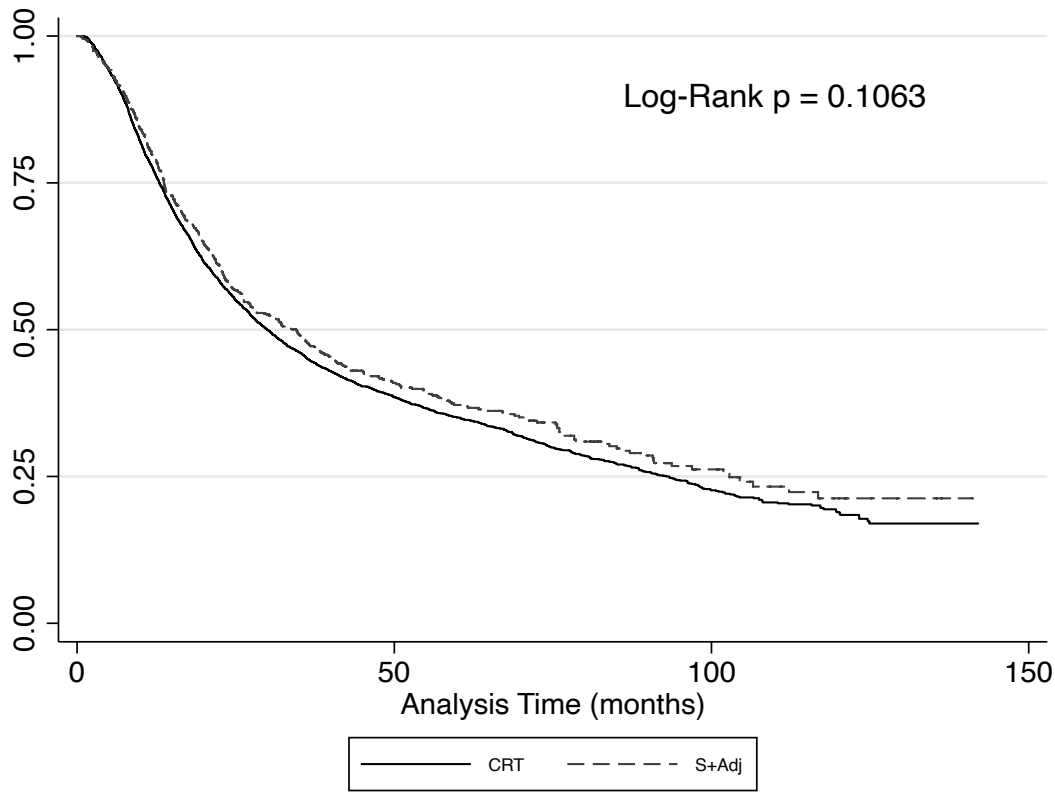

Supplement: NIHMS1734389-supplement-3.pdf [file NIHMS1734389-supplement-3.pdf]

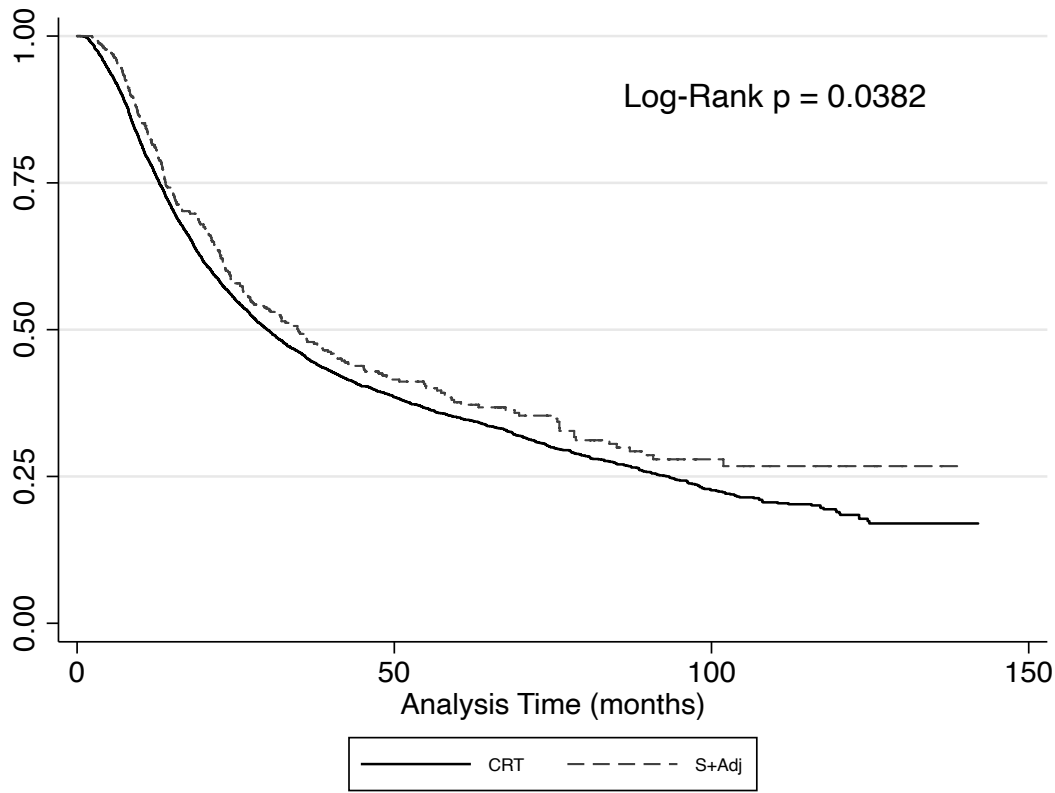

Supplement: NIHMS1734389-supplement-4.pdf [file NIHMS1734389-supplement-4.pdf]

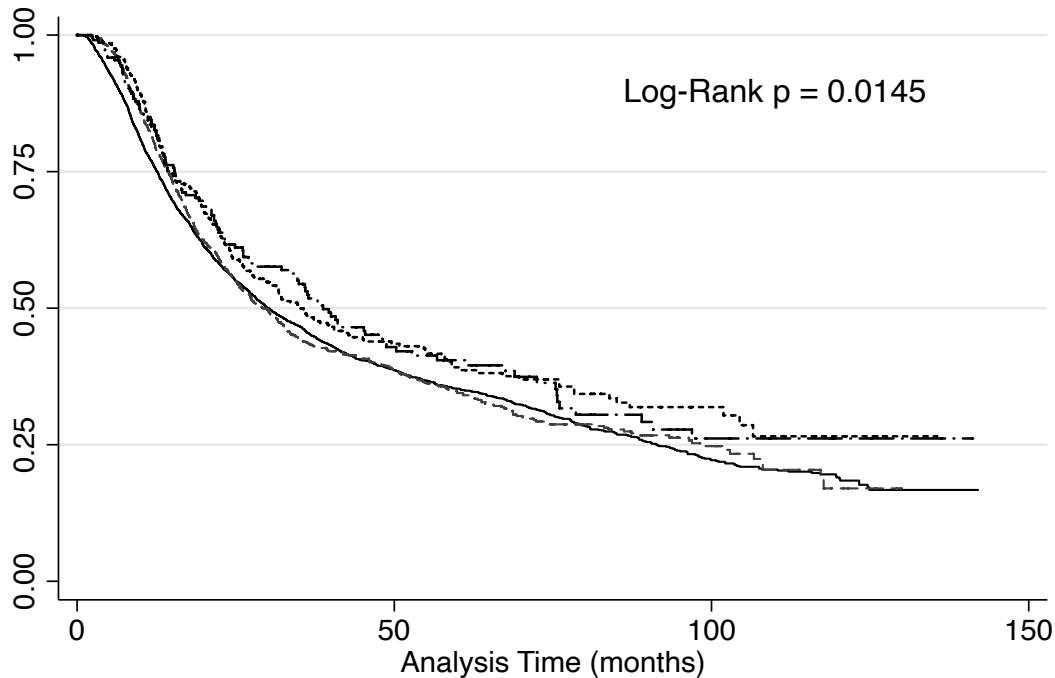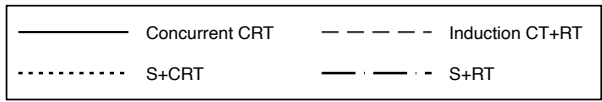

Supplement: NIHMS1734389-supplement-5.pdf [file NIHMS1734389-supplement-5.pdf]

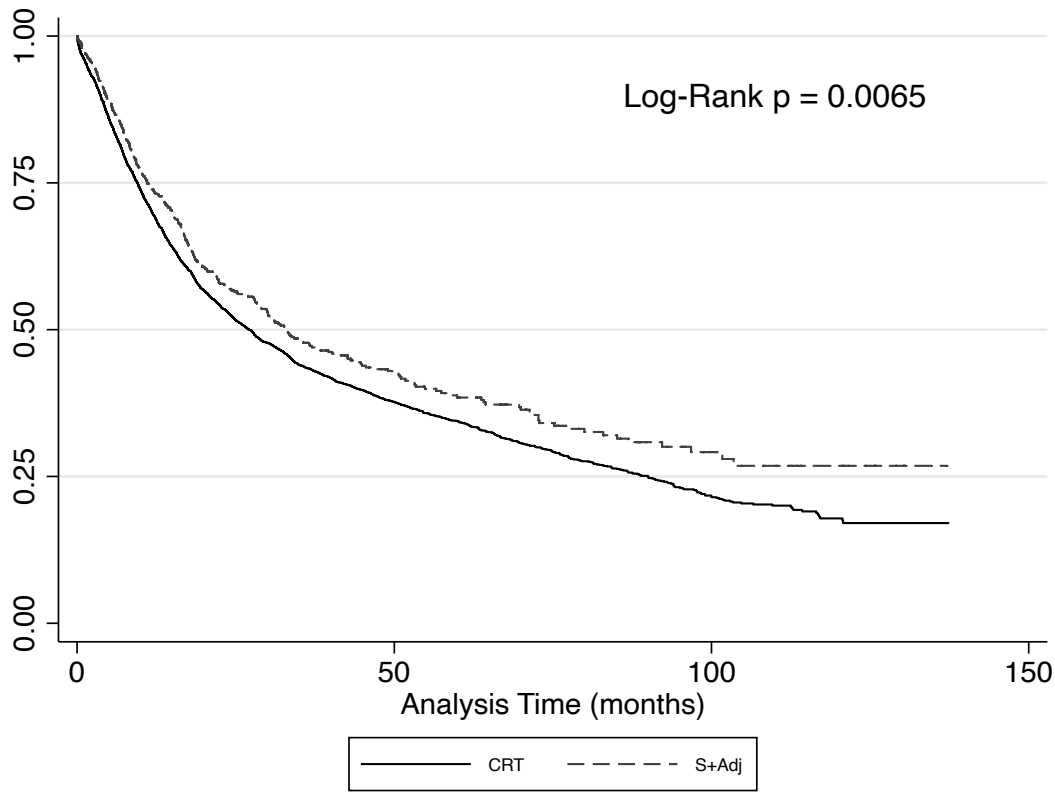

Supplement: NIHMS1734389-supplement-6.pdf [file NIHMS1734389-supplement-6.pdf]
